# Supplementary material for: A recessive allele for delayed flowering at the soybean maturity locus E9 is a leaky allele of FT2a, a FLOWERING LOCUS T ortholog
Source: PubMed Central journal article supplement (PMC4719747; doi:10.1186/s12870-016-0704-9), 2016-01-19
Supplement: 12870_2016_704_MOESM1_ESM.pdf [file 12870_2016_704_MOESM1_ESM.pdf]

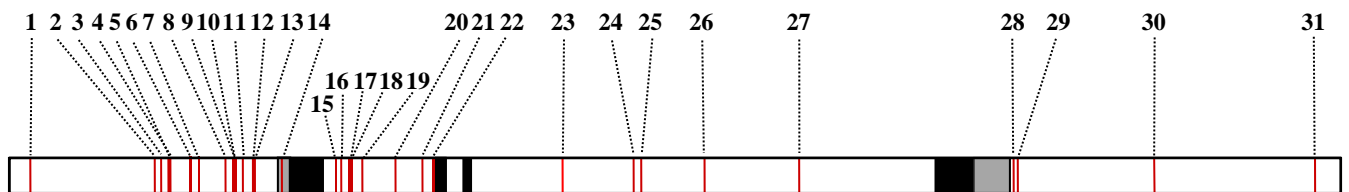

|            | 1        | 2    | 3     | 4    | 5    | 6    | 7    | 8    | 9    | 10   | 11   | 12   | 13   | 14     |
|------------|----------|------|-------|------|------|------|------|------|------|------|------|------|------|--------|
|            | Promoter |      |       |      |      |      |      |      |      |      |      |      |      | 5' UTR |
|            | -1544    | -772 | -731  | -698 | -694 | -571 | -544 | -402 | -379 | -375 | -349 | -279 | -274 | -47    |
| Toyomusume | A        | T    | 43 bp | A    | T    | G    | AT   | G    | G    | G    | T    | -    | -    | -      |
| TK780      | A        | T    | 43 bp | A    | T    | G    | AT   | G    | G    | G    | T    | -    | -    | -      |
| Hayahikari | T        | T    | 43 bp | A    | T    | G    | AT   | G    | G    | G    | T    | -    | GATC | 10 bp  |
| Hidaka 4   | A        | A    | -     | T    | -    | T    | AT   | A    | G    | G    | C    | -    | -    | 10 bp  |
| Harosoy    | A        | A    | -     | T    | T    | G    | -    | G    | A    | A    | T    | G    | -    | 10 bp  |

|            | 15       | 16  | 17  | 18  | 19  | 20  | 21     | 22  |
|------------|----------|-----|-----|-----|-----|-----|--------|-----|
|            | Intron I |     |     |     |     |     |        |     |
|            | 294      | 315 | 398 | 403 | 475 | 710 | 965    | 988 |
| Toyomusume | G        | C   | C   | T   | T   | T   | SORE-1 | T   |
| Hayahikari | G        | C   | A   | T   | C   | C   | -      | C   |
| Harosoy    | T        | T   | A   | A   | T   | T   | -      | T   |

|            | 23                                                    | 24                  | 25                    | 26                | 27   | 28                   | 29               | 30   | 31   |
|------------|-------------------------------------------------------|---------------------|-----------------------|-------------------|------|----------------------|------------------|------|------|
|            | Intron II                                             |                     |                       |                   |      | 3' downstream region |                  |      |      |
|            | 2150                                                  | 2604                | 2648                  | 3022              | 3783 | 4606                 | 4628             | 5300 | 6630 |
| Toyomusume | (C) <sub>10</sub> A (C) <sub>8</sub> (A) <sub>6</sub> | (T) <sub>11</sub> T | (AT) <sub>8-11</sub>  | (A) <sub>10</sub> | -    | A                    | (A) <sub>6</sub> | G    | A    |
| Hayahikari | (C) <sub>10</sub> A (C) <sub>8</sub> (A) <sub>6</sub> | (T) <sub>10</sub> A | (AT) <sub>18</sub>    | (A) <sub>10</sub> | 9 bp | A                    | (A) <sub>7</sub> | G    | G    |
| Harosoy    | (C) <sub>16</sub> (A) <sub>9</sub>                    | (T) <sub>11</sub> A | (AT) <sub>27-30</sub> | (A) <sub>9</sub>  | -    | G                    | (A) <sub>6</sub> | T    | A    |

43 bp-indel CCCCTGCTAATCTTCTTCCTCCTCACACATTGCTTCTCACCCC

10 bp-indel GAAAGCATAA

*SORE-1* *Ty1/copia-like* retrotransposon (6,224 bp)

9 bp-indel AAAGAAAAA

**Additional file 1. DNA polymorphisms detected in the *FT2a* genomic region for four soybean cultivars or breeding line and a wild soybean accession.**
