# Supplementary material for: A recessive allele for delayed flowering at the soybean maturity locus E9 is a leaky allele of FT2a, a FLOWERING LOCUS T ortholog
Source: PubMed Central journal article supplement (PMC4719747; doi:10.1186/s12870-016-0704-9), 2016-01-19
Supplement: 12870_2016_704_MOESM2_ESM.pdf [file 12870_2016_704_MOESM2_ESM.pdf]

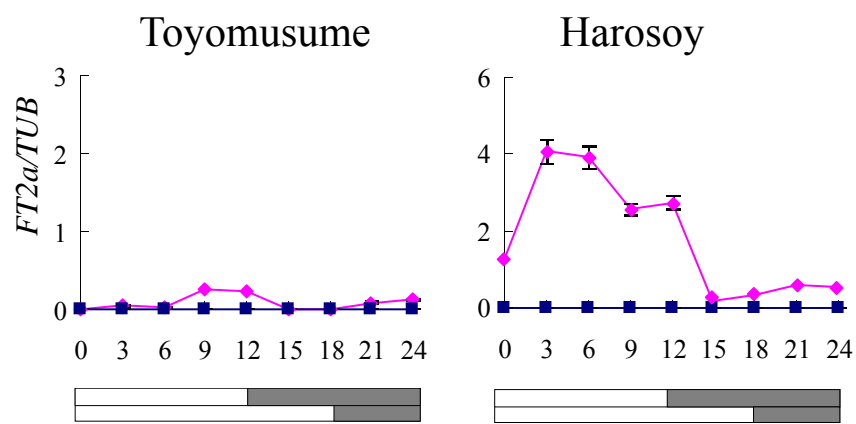

**Additional file 2. Diurnal expression patterns of *FT2a*.**

Transcript abundances of *FT2a* were analyzed in SD (pink line) and LD (blue line) conditions.
