# Supplementary material for: A recessive allele for delayed flowering at the soybean maturity locus E9 is a leaky allele of FT2a, a FLOWERING LOCUS T ortholog
Source: PubMed Central journal article supplement (PMC4719747; doi:10.1186/s12870-016-0704-9), 2016-01-19
Supplement: 12870_2016_704_MOESM3_ESM.pdf [file 12870_2016_704_MOESM3_ESM.pdf]

| Area targeted | Primer sequence (5' – 3') |                             | Annealing temperature | Extension time |
|---------------|---------------------------|-----------------------------|-----------------------|----------------|
| FT2a-a        | F                         | TAAACTAGTGTGCACACTATCCC     | 60° C                 | 25 s           |
|               | R                         | TATAGAAGTTCCTGAGGTCATCACCA  |                       |                |
| FT2a-b        | F                         | GGGGAGTAATTGGGGATGTATTGG    | 60° C                 | 25 s           |
|               | R                         | AAACTAGCCCCTGTTGTTGC        |                       |                |
| FT2a-c        | F                         | GGATTGCCAGTTGCTGCTGT        | 60° C                 | 25 s           |
|               | R                         | GAGTGTGGGAGATTGCCAAT        |                       |                |
|               |                           |                             |                       |                |
| tubulin       | F                         | GAGAAGAGTATCCGGATAGG        | 60° C                 | 25 s           |
|               | R                         | GAGCTTGAGTGTTCGGAAAC        |                       |                |
|               |                           |                             |                       |                |
| a             | F                         | GGGGATAATTGGGGATGTATTGG     | 60° C                 | 20 s           |
|               | R                         | CAAAAAGAGTACTTGGACAA        |                       |                |
| b             | F                         | GGGGAGTAATTGGGGATGTATTGG    | 60° C                 | 1 min 20 s     |
|               | R                         | CACCATCTAGAGAGTGGGAAGAGAGAG |                       |                |
| c             | F                         | GGGGAGTAATTGGGGATGTATTGG    | 60° C                 | 1 min 36 s     |
|               | R                         | ACCAAGAATAAACATTGGGT        |                       |                |
| d             | F                         | AACTTCATGATCAAGGTGCT        | 60° C                 | 2 min          |
|               | R                         | AAACTAGCCCCTGTTGTTGC        |                       |                |
| e             | F                         | GCTCTCTCTCTCCACTCTCTAGATGG  | 60° C                 | 40 s           |
|               | R                         | AAACTAGCCCCTGTTGTTGC        |                       |                |
| f             | F                         | GGGTAAATATCGGTGGTGATGAC     | 64° C                 | 8 min          |
|               | R                         | AAACTAGCCCCTGTTGTTGC        |                       |                |

**Additional file 3. Sequences of primers used in expression and RNA processing analyses of *FT2a*.** Targeted *FT2a* areas are shown in Figure 6 (a to c) and Figure 7 (a to f).
