# Supplementary material for: A recessive allele for delayed flowering at the soybean maturity locus E9 is a leaky allele of FT2a, a FLOWERING LOCUS T ortholog
Source: PubMed Central journal article supplement (PMC4719747; doi:10.1186/s12870-016-0704-9), 2016-01-19
Supplement: 12870_2016_704_MOESM4_ESM.pdf [file 12870_2016_704_MOESM4_ESM.pdf]

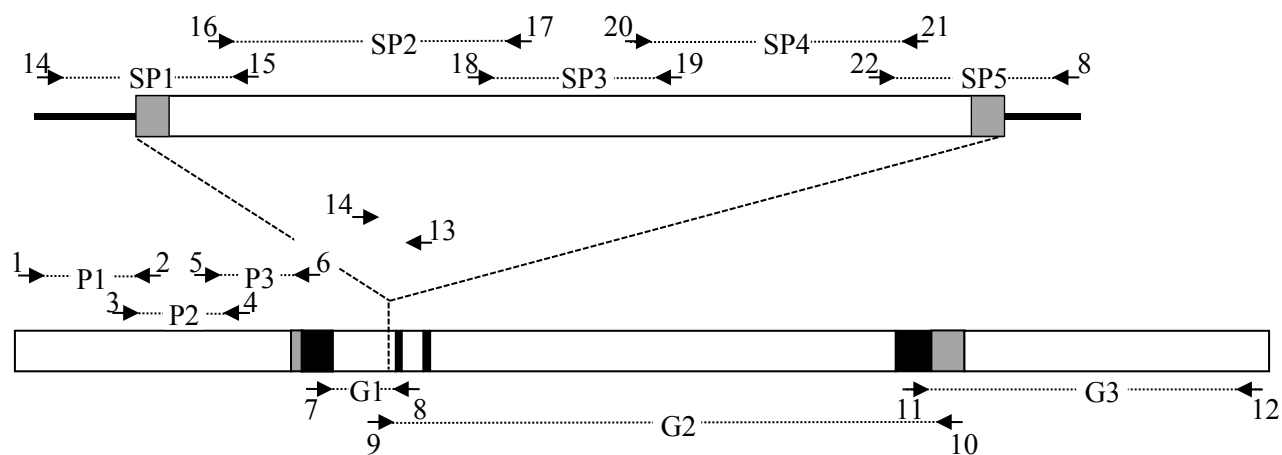

| Area targeted         | Primer sequence (5' – 3')         | Annealing temperature | Extension time |
|-----------------------|-----------------------------------|-----------------------|----------------|
| P1                    | 1 AACAAAGAGAGAGAGAGGAAC           | 57 °C                 | 1 min          |
|                       | 2 GCTTTCCTCTCAATTAAGAATC          |                       |                |
| P2                    | 3 CCTACAAACAAAATTGATGATGTTCTAG    | 57 °C                 | 1 min          |
|                       | 4 TTCAAACATTTTCACATCCCTTC         |                       |                |
| P3                    | 5 AGTCATACATTACGGAATCTAGTT        | 57 °C                 | 45 s           |
|                       | 6 CTTCCACTAGGCATGGGATA            |                       |                |
| G1                    | 7 GGGGAGTAATTGGGGATGTATTGG        | 56 °C                 | 1 min 20 s     |
|                       | 8 CTAGGTGCATCGGGATCAAC            |                       |                |
| G2                    | 9 TATATTCTTAGTGCAATCGAGGATCATTAG  | 62 °C                 | 4 min          |
|                       | 10 GGGAGATTGCCAATTAATA TTCTGAAA   |                       |                |
| G3                    | 11 ATTCGTCAACTGGTATGGGAG          | 55 °C                 | 3 min          |
|                       | 12 GCAGATTCTCATAACGTCGGAG         |                       |                |
| Genomic walker primer | 13 AGTCACCAACCTGACACATTGAGAGAAGAT | 63 °C                 | 4 min          |
| Full SORE-1           | 14 ACCCTCTCAAGTGGACATGT           | 62 °C                 | 8 min 30 s     |
|                       | 8 CTAGGTGCATCGGGATCAAC            |                       |                |
| SP1                   | 14 ACCCTCTCAAGTGGACATGT           | 60 °C                 | 1 min 30 s     |
|                       | 15 CGATAACTCAGCTGCTGTCT           |                       |                |
| SP2                   | 16 CCTTAAATTTAAACGGTGGC           | 55 °C                 | 2 min          |
|                       | 17 ACATGATTGGCATCCACAA            |                       |                |
| SP3                   | 18 CAGGATCATTTTCAGTCCA            | 55 °C                 | 1 min 30 s     |
|                       | 19 TTCCTCTATGTTATGGCACC           |                       |                |
| SP4                   | 20 CATCCAATGCTTCGFATTTG           | 55 °C                 | 1 min 30 s     |
|                       | 21 GACATAGATTATGCTATAAGG          |                       |                |
| SP5                   | 22 AACTTCATGATCAAGGTGCT           | 60 °C                 | 2 min          |
|                       | 8 CTAGGTGCATCGGGATCAAC            |                       |                |

**Additional file 4. Genomic positions and sequences (5' – 3') of primers used in sequencing of the *FT2a* genomic region and *Ty1/copia*-like retrotransposon, *SORE-1*.** Primer 13 was used for nested PCRs for genome libraries of Toyomusume. The PCR products amplified with primers 14 and 8 were used as template in PCR amplifications for the *SORE-1* and its flanking region (SP1 to SP5).
