# Supplementary material for: A recessive allele for delayed flowering at the soybean maturity locus E9 is a leaky allele of FT2a, a FLOWERING LOCUS T ortholog
Source: PubMed Central journal article supplement (PMC4719747; doi:10.1186/s12870-016-0704-9), 2016-01-19
Supplement: 12870_2016_704_MOESM5_ESM.pdf [file 12870_2016_704_MOESM5_ESM.pdf]

| Locus                   | Primer sequence (5' – 3') |                          | Annealing temperature | Size of fragment (bp) |             |
|-------------------------|---------------------------|--------------------------|-----------------------|-----------------------|-------------|
| Alleles                 |                           |                          |                       |                       |             |
| <i>E1</i> <sup>1)</sup> | F                         | CACTCAAATTAAGCCCTTTCA    | 60 °C                 | <i>e1-as</i>          | 222         |
| <i>e1-as/e1-nl</i>      | R                         | TTCATCTCCTCTTCATTTTTGTTG |                       | <i>e1-nl</i>          | no products |
| <i>E3</i> <sup>2)</sup> | E3_08557FW                | TGGAGGGTATTGGATGATGC     | 58 °C                 | <i>E3</i>             | 558         |
| <i>E3/e3-tr</i>         | E3Ha_1000RV               | CGGTCAAGAGCCAACATGAG     |                       | <i>e3-tr</i>          | 275         |
|                         | e3tr_0716RV               | GTCCTATACAATTCTTTACGACG  |                       |                       |             |
| <i>E4</i> <sup>3)</sup> | F                         | AGACGTAGTGCTAGGGCTAT     | 55 °C                 | <i>E4</i>             | 1,229       |
| <i>E4/e4-SORE-1</i>     | R2                        | GCATCTCGCATCACCCAGATCA   |                       | <i>e4-SORE-1</i>      | 837         |
|                         | R3                        | GTCATCCCTTCGAATTCAG      |                       |                       |             |

**Additional file 5. Primers, PCR conditions and expected amplified fragment sizes for allele-specific DNA markers.**

1, 3) Xu et al. [29], 2) Tsubokura et al. [18]
