# Supplementary material for: A recessive allele for delayed flowering at the soybean maturity locus E9 is a leaky allele of FT2a, a FLOWERING LOCUS T ortholog
Source: PubMed Central journal article supplement (PMC4719747; doi:10.1186/s12870-016-0704-9), 2016-01-19
Supplement: 12870_2016_704_MOESM6_ESM.pdf [file 12870_2016_704_MOESM6_ESM.pdf]

| Area targeted | Primer sequence (5' – 3') |                              | Annealing temperature | Extension time |
|---------------|---------------------------|------------------------------|-----------------------|----------------|
| a             | F                         | TGAAGTCTCTGAACATGCACGC       | 58 °C                 | 1 min          |
|               | R                         | CACCTTTATATATTCTCATATCTGTC   |                       |                |
| b             | F                         | AAAGGTGAAATATATATTGTTGG      | 64 °C                 | 40 s           |
|               | R                         | CTTCCACTAGGCATGGGATA         |                       |                |
| c             | F                         | TATAGAAATTTAGAAATTTCTAGCAGCG | 60 °C                 | 40 s           |
|               | R                         | TTCAAACATTTTACATCCCCTCC      |                       |                |
| d             | F                         | GATTCTTAATTGAGAGGGAAAAGC     | 60 °C                 | 40 s           |
|               | R                         | AAAGGAGCAGCAAAACGCTA         |                       |                |
| e             | F                         | GGAATCGAGGCTATTGACTA         | 58 °C                 | 1 min          |
|               | R                         | CAAAAAGAGTACTTGGACAA         |                       |                |
| f             | F                         | ACCAAGCTAGAATAATTTTTGTGAG    | 60 °C                 | 40 s           |
|               | R                         | TGAGTGGTGGGGTTTTCTTT         |                       |                |
| g             | F                         | ACCCTCTCAAGTGGACATGT         | 64 °C                 | 40 s           |
|               | R                         | AAACTAGCCCCTGTTGTTGC         |                       |                |
| h             | F                         | ACACGCCATGAATGCAACA          | 64 °C                 | 40s            |
|               | R                         | GCAAGCAAACATTGTGCGTT         |                       |                |
| i             | F                         | CCGAATTCTTAAAGTGCATGCA       | 64 °C                 | 40s            |
|               | R                         | GCCAGAAACACTCATACTACT        |                       |                |
| j             | F                         | GGACAGCAGTAGTAGGACCA         | 64 °C                 | 1 min 35 s     |
|               | R                         | GGGAGATTGCCAATTAATTTTCTGAAA  |                       |                |
| k             | F                         | TGATAGTCTATGGGATTGTGC        | 64 °C                 | 40 s           |
|               | R                         | CCAAGCTTCCAACCGTGAAA         |                       |                |
| S1            | F                         | AATATAGTAGTAGTTTCTAGCTT      | 60 °C                 | 40 s           |
|               | R                         | ACCAAGAATAAACATTGGGT         |                       |                |
| S2            | F                         | TATATCATGATGCTGTGGG          | 64 °C                 | 1 min 35 s     |
|               | R                         | CTAGGTGCATCGGGATCAAC         |                       |                |
| S3            | F                         | GCTCTCTCTTCCACTCTCTAGATGG    | 64 °C                 | 40 s           |
|               | R                         | AAACTAGCCCCTGTTGTTGC         |                       |                |
| S4            | F                         | CCAAGTATTTCATTTTCAT          | 64 °C                 | 1 min 35 s     |
|               | R                         | GCAAGCAAACATTGTGCGTT         |                       |                |

**Additional file 6. Sequences of primers used in methylation analysis of *FT2a*.** Targeted areas are presented in Figure 8.
